# Supplementary material for: The Art of Barniz de Pasto and Its Appropriation of Other Cultures
Source: MDPI journal article supplement (doi:10.3390/heritage6030174), 2023-03-22
Supplement: s1 [file s1]

## Article

# Arte del barniz de Pasto y las apropiaciones de otras culturas

Yayoi Kawamura

Universidad de Oviedo, Departamento de Historia del Arte y Musicología, Campus de Humanidades, c/ Amparo Pedregal s/n, 33011, Oviedo, Asturias, España. kawamura@uniovi.es

**Resumen:** El estudio se basa en el análisis de las técnicas y de los motivos decorativos de varias obras de barniz de Pasto para señalar sus características y establecer comparaciones con los fenómenos artísticos de Asia y de Europa. Por un lado, observamos el posible vínculo con las obras de laca japonesa de exportación de los siglos XVII y XVIII, de estilo Namban y de estilo Pictórico. Esta búsqueda de las similitudes está justificada por las pruebas documentales y materiales de las obras japonesas de estos dos estilos transportadas de Japón al mundo virreinal americano a través del galeón de Manila y la vía comercial entre Acapulco y Callao. Por otro lado, analizamos las huellas de la cultura española en el barniz de Pasto, señalando en una arqueta la incorporación de las imágenes impresas que circulaban en el virreinato del Perú. Esta apropiación también observada en la pintura mural de una iglesia de los Andes centrales y la presencia de la imagen de Amaru, deidad quechua, en la misma arqueta nos conducen a hablar de los Andes centrales como uno de los posibles lugares del asentamiento de la práctica del barniz de Pasto. Todo ello señala la gran capacidad de apropiar las culturas ajenas y fusionarlas con la suya propia del centro y sur América durante el periodo virreinal manifestada en el arte del barniz de Pasto.

**Palabras claves:** barniz de Pasto; virreinato del Perú; laca; laca japonesa de exportación; emblemas; Amaru; apropiación

**Citation:** Kawamura, Y. The Art of Barniz de Pasto and Its Appropriation of Other Cultures. *Heritage* **2023**, *6*, 174. <https://doi.org/10.3390/heritage6030174>

Academic Editor: Lucia Burgio, Dana Melchar and Monica Katz

Received: 24 December 2022

Revised: 12 March 2023

Accepted: 17 March 2023

Published: 22 March 2023

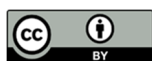

**Copyright:** © 2023 by the authors. Licensee MDPI, Basel, Switzerland. This article is an open access article distributed under the terms and conditions of the Creative Commons Attribution (CC BY) license (<https://creativecommons.org/licenses/by/4.0/>).

## 1. Introducción

El barniz de Pasto ha sido un arte escasamente conocido y estudiado hasta hace dos décadas incluso entre los especialistas del arte hispanoamericano. Esta realidad está siendo corregida gradualmente. En el caso de España, el Museo de América de Madrid viene incrementando sus piezas de la colección e incluso ha organizado seminarios específicos para aumentar nuestro conocimiento con la presencia de los especialistas de distintos países<sup>0</sup>. También hubo exposiciones que han contribuido al mejor conocimiento de este arte [1, 2]. Por otro lado, el cada vez mayor interés que existe en Estados Unidos de América sobre el arte hispanoamericano viene promoviendo el estudio sobre el barniz de Pasto, y son de especial mención las exposiciones celebradas en Philadelphia Museum of Art, Brooklyn Museum y Museum of Fine Arts, Boston [3-5]. Asimismo, los estudios sobre las obras de Hispanic Society of América son de gran interés [6, 7]. Por otro lado, los estudios materiales y botánicos en Estados Unidos de América y Colombia han aportado nuevos conocimientos sobre este arte [8-16].

En la actualidad, es comúnmente aceptado que la producción del barniz de Pasto se daba en distintas zonas en el virreinato del Perú, y no es exclusivo de la zona de Pasto, situada en el suroeste de Colombia, donde en la actualidad sigue practicándose este arte, y que en el proceso evolutivo de este arte confluyeron varios factores de procedencias diversas, no solo europea sino también asiática, corrigiendo de esta manera la tradicional visión eurocentrista a la hora de analizar el arte hispanoamericano.

Recientemente existen varios estudios que prueban la llegada de mercancías asiáticas al virreinato del Perú desde finales del siglo XVI, en su inicio directamente desde Manila, y más tarde desde Acapulco. De esta manera, se trazó una importante ruta de extensión

del galeón de Manila, que unía Acapulco y el puerto de Callao, activada y mantenida por los comerciantes mexicanos y sobre todo por los peruleros, respaldados por la abundancia de plata que se producía en el territorio virreinal peruano. El comercio de mercancías transpacífico funcionaba con total autonomía, fuera de las normativas dictadas por el Real y Supremo Consejo de Indias del gobierno español [17-19]. Así se transportaban las mercancías de lujo y sobre todo el textil de procedencia asiática al virreinato del Perú y se producía la sangría de la plata peruana en Asia sin llegar a España [20-22].

Estos estudios de índole histórico y económico nos ayudan a comprender que las huellas del arte de Asia –de laca, de porcelana y de textil especialmente– no hay que buscarlas solo en el virreinato de Nueva España sino también en el del Perú. Y teniendo el foco en el arte de la laca, las huellas de la laca japonesa de exportación, del estilo Namban (fig. 1) y del Pictórico (fig. 2), ya señaladas en el arte de la laca mexicana o maque, y en el arte del enconchado – tanto de la pintura como del mueble - debemos de ampliarlas ahora al barniz de Pasto. Además, a pesar de ser llamado tradicionalmente “barniz”, este arte se puede considerar una variante del arte de la laca. Por otro lado, la gran cantidad de los textiles chinos y también indios pudo ejercer influencias en la difusión de los elementos o motivos decorativos de raíz asiática en la decoración del barniz de Pasto [23].

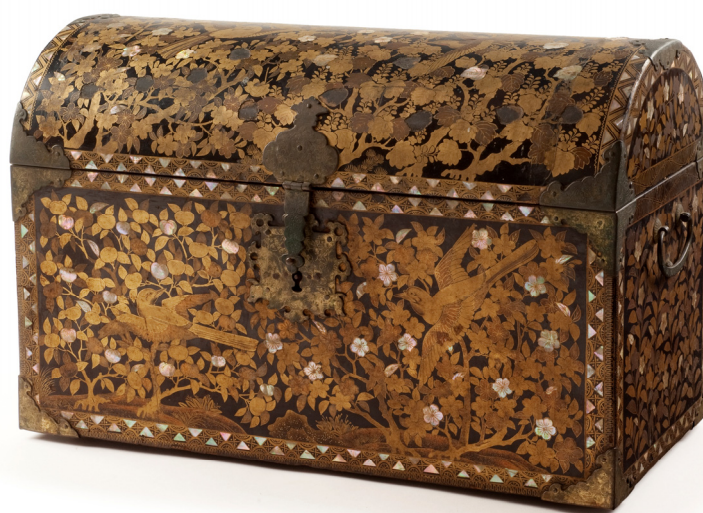

**Figura 1:** Arqueta de laca de estilo Namban, parroquia de Cortes, Navarra, España. Japón, 1580-1630. Fotografía de R. Suárez Pascual.

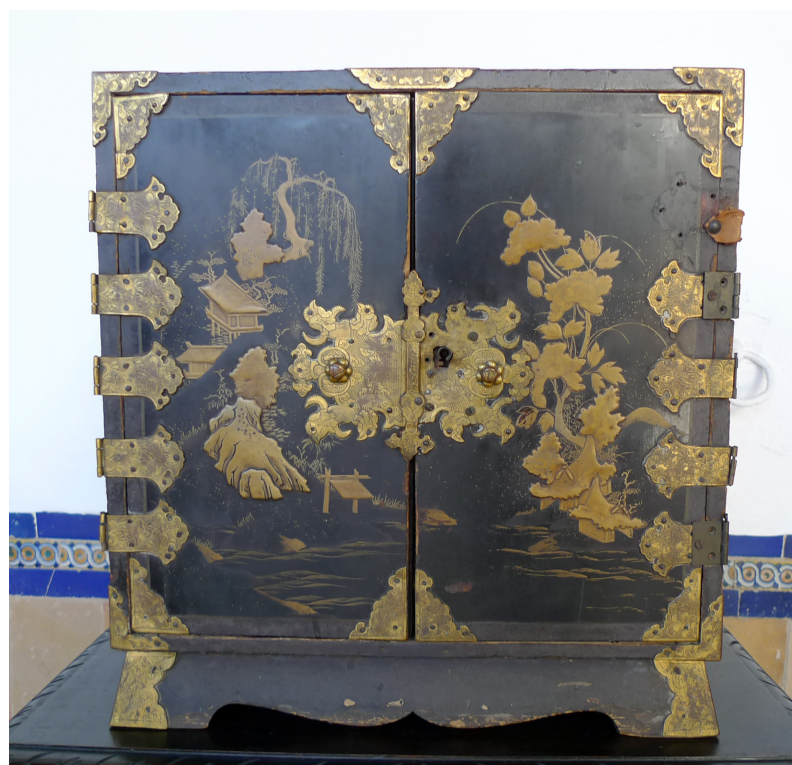

**Figura 2.** Escritorio de laca de estilo Pictórico, monasterio de Santa Paula, Sevilla, España. Japón 1640-1700. Fotografía de la autora.

Asimismo, no debemos de olvidarnos en el estudio del barniz de Pasto de las huellas del mundo europeo, puesto que la cultura dominante que estaba extendiéndose en el virreinato peruano fue la española. Buscar los indicios concretos de los influjos de esta cultura también ayudan a entender mejor el arte del barniz de Pasto.

Para abordar el presente estudio, aplicamos el método comparativo, es decir, realizar el análisis de los aspectos técnicos e iconográficos de varias obras del barniz de Pasto – incluyendo obras no estudiadas hasta ahora – y buscar las similitudes con otras artes para señalar posibles influjos y apropiaciones.

## 2. Laca de Asia como fuentes de inspiración para el barniz de Pasto

En las fechas avanzadas del siglo XVI, en la fase de consolidación del virreinato del Perú, el barniz de Pasto experimentó un cambio sustancial [15]. Dejó de ser un material de relleno en los surcos grabados de distintos objetos, comenzó a ser aplicado en forma de finas membranas, que cubrían enteramente la superficie de madera y, de este modo, los objetos se hacían más resistentes y ganaban un brillo especial, el cual dio origen al término "barniz". Asimismo, la superposición de esas delgadas láminas de diferentes colores recortadas en diversas formas fue inventada para decorar las obras. Esta nueva manera de trabajar con la resina de mopa-mopa, es decir en forma de membranas [15] (pp. 55-57), se ha considerado como consecuencia de la hibridación de dos culturas, la autóctona y la española, y especialmente se ha apuntado la influencia de la pintura de la imaginería española –escultura de madera policromada—. También idearon insertar una fina hoja de plata entre las láminas, y así surgió el barniz de Pasto brillante, técnica que también es considerada paralela al dorado y el estofado de la imaginería española [13, 15].

Para entender mejor el singular avance técnico y artístico del barniz de Pasto desde las últimas décadas del siglo XVI, cabría otro planteamiento: la capacidad de absorber distintas influencias foráneas, incluso transpacíficas, a la hora de innovar el arte en tierras americanas. En ese sentido, aparte del peso que pudo ejercer distintas técnicas de decorar

la imaginería española, es muy probable que la llegada de los objetos lacados del otro lado del Pacífico desde el último cuarto del siglo XVI sea un asunto a tener en cuenta [1] (pp. 22–59 [24]). Se constatan documental y materialmente los envíos desde Manila a Acapulco de la laca de procedencia asiática, especialmente la japonesa por haber creado los artífices japoneses un género específico para la exportación al mundo europeo llamado el estilo Namban (h. 1580–h. 1630) y el Pictórico (h. 1640–h. 1700). Desde finales del siglo XVI, las piezas de laca japonesa fueron muy apreciadas por los españoles asentados en Filipinas. Antonio de Morga (Sevilla, 1559–Quito, 1636), oidor y teniente gobernador y capitán general de Filipinas entre 1595 y 1603, autor de *Sucesos de las Islas Filipinas*, hace mención a las mercancías que llegaban del puerto de Nagasaki, entre las cuales encontramos objetos lacados [25] (pp. 313–314). El gobernador Rodrigo de Vivero (México, 1564–Orizaba, 1636) hace referencia en su *Relación de Japón* a las mercancías japonesas de lujo enviadas a Nueva España, en las que figuran escritorios lacados [26] (p. 99). El oidor de la Audiencia de Manila Juan Manuel de la Vega envió en 1612 un escritorio de laca japonesa a Juan Ruiz de Contreras, secretario del Real y Supremo Consejo de Indias de Madrid [1] (pp. 38–39). El gobernador de Filipinas Alonso Fajardo poseía en 1624 diecinueve piezas de laca japonesa [27]. Estos textos son pruebas del aprecio hacia la laca japonesa y su llegada a través del galeón de Manila a Acapulco, desde donde se distribuyeron a tierras americanas y a España [1] (pp. 53–59) [28].

Aún no existe un exhaustivo estudio de los inventarios de bienes del virreinato peruano que demuestren la presencia de las obras de laca japonesa, pero el marco hecho con fragmentos de laca de estilo Namban de una colección particular de Lima [29] (p. 315) y la arqueta de laca Namban de Brooklyn Museum adquirida en Perú en 1941 por Herbert J. Spinden [4] (p. 21) constituyen prueba de la llegada de la laca japonesa al virreinato peruano.

Sobre la cuestión de la similitud entre el barniz de Pasto y la laca japonesa y la de Ryukyu –actual isla de Okinawa, Japón– existen varios estudios. Coddington señala la gran similitud de los motivos de los monos entre las ramas de la flor de la pasión del escritorio de Hispanic Society of America con los motivos de las ardillas en las vides de las cajas lacadas de Okinawa [7] (p. 81), y Kawamura establece varios aspectos paralelos entre el barniz de Pasto y la laca japonesa [30, 31].

En cuanto a los objetos elaborados, abundan las arquetas, escritorios (fig. 3) y atriles plegables (fig. 4), que son tipos de objetos también muy comunes en la laca japonesa de estilo Namban. En el caso del atril plegable, es un modelo inexistente en Europa y se cultivó en Japón –quizás inspirado en el atril del mundo islámico– por ser una forma que ocupaba poco espacio en los barcos. Por lo tanto, la existencia del atril plegable en el barniz de Pasto se debe con casi toda seguridad al atril de laca Namban (fig. 5), cuya producción fue importante en su número. Por otro lado, como piezas poco frecuentes se pueden señalar copas en forma de piña (fig. 6) y bacías (fig. 7), cuyas formas claramente proceden del arte de la platería de origen europeo.



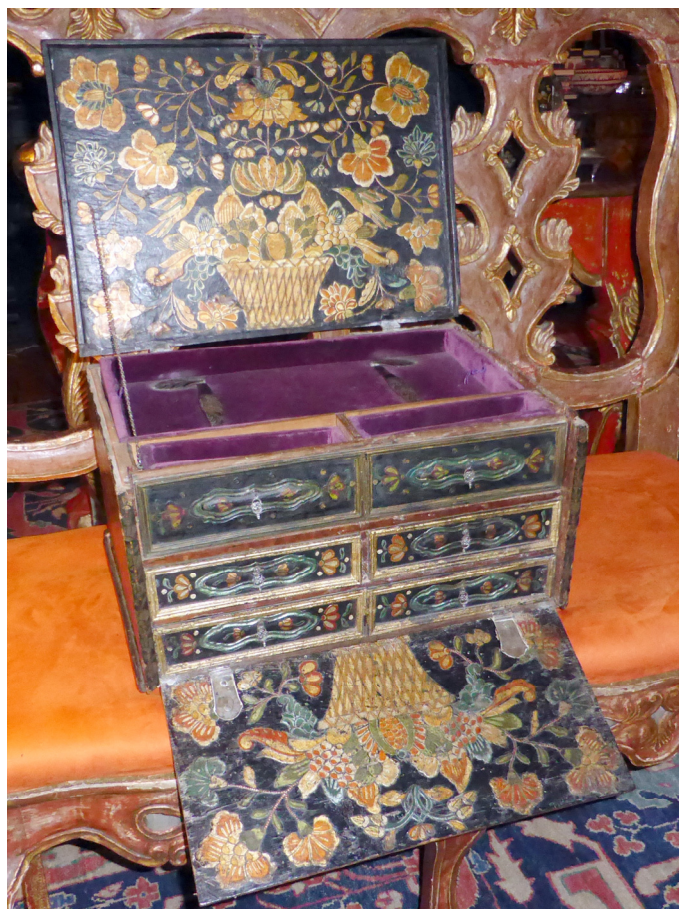

**Figura 3.** Escritorio de barniz de Pasto, colección Rodrigo Rivero Lake Int. Virreinato del Perú, siglos XVII-XVIII. Fotografía de la autora.

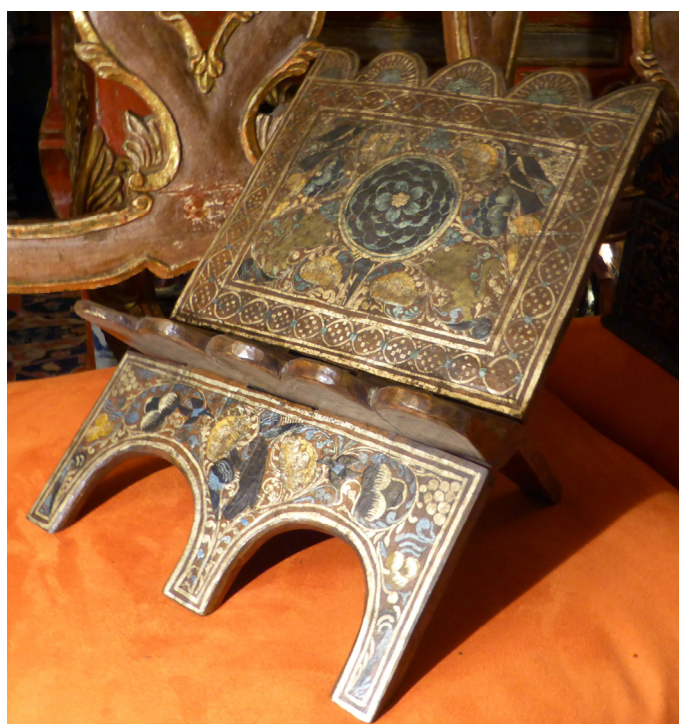

**Figura 4.** Atril plegable de barniz de Pasto, colección Rodrigo Rivero Lake Int. Virreinato del Perú, siglos XVII-XVIII. Fotografía de la autora.

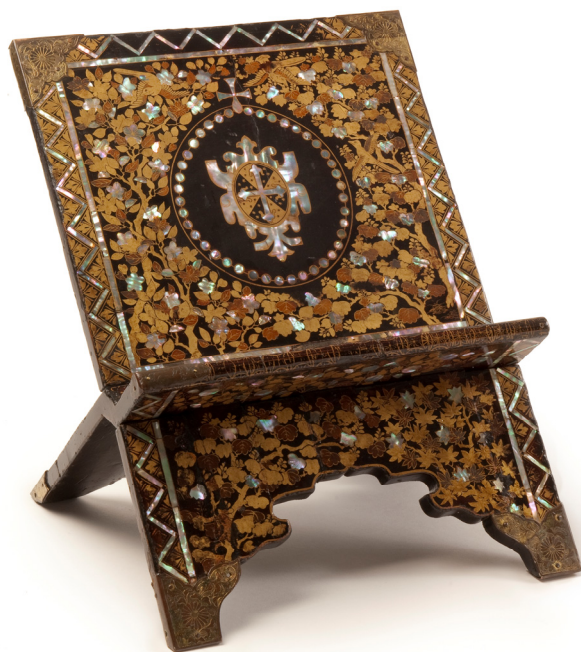

**Figura 5.** Atril plegable de laca de estilo Namban, convento de San Esteban, Salamanca, España. Japón, 1580-1630. Fotografía de Rafael Suárez Pascual.

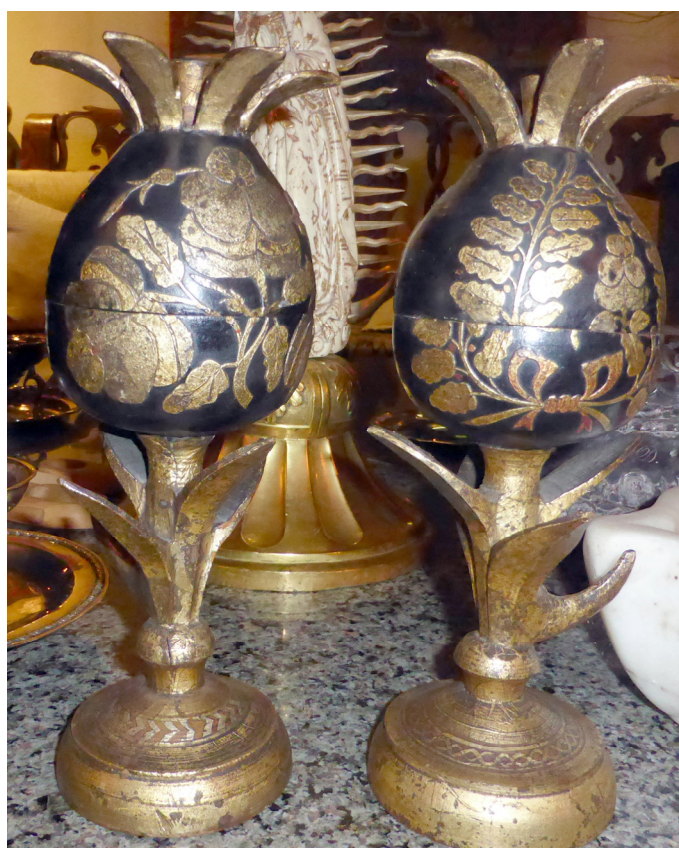

**Figura 6.** Copas de barniz de Pasto, colección Rodrigo Rivero Lake Int. Virreinato del Perú, siglos XVII-XVIII. Fotografía de la autora.



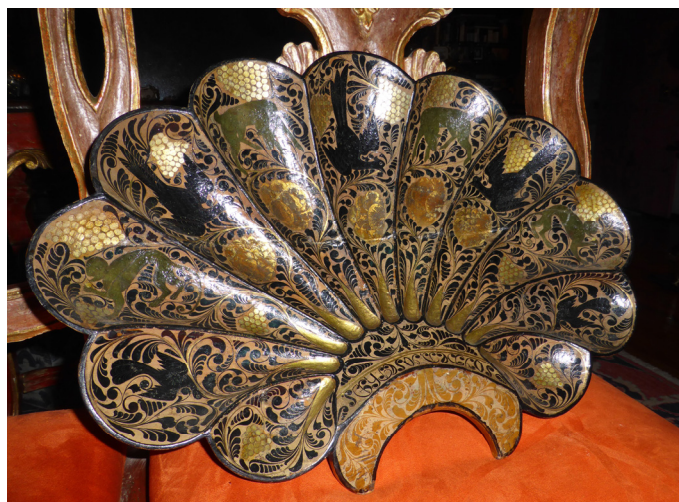

**Figura 7.** Bacia de barniz de Pasto, colección Rodrigo Rivero Lake Int. Virreinato del Perú, siglos XVII-XVIII. Fotografía de la autora.

La similitud de los motivos decorativos entre el barniz de Pasto y la laca japonesa es muy evidente. La laca Namban está decorada con plantas y árboles acompañados de aves y a veces leones, y en el barniz de Pasto la presencia de plantas y aves son constantes. La manera de aplicar estos elementos decorativos es también común entre las dos artes. Se llena la superficie con gran carga decorativa a modo de *horror vacui*<sup>2</sup>. También el brillo del barniz de Pasto con hoja de plata recuerda el brillo del polvo de oro —técnica de *makie* plano o *hira makie*— (fig. 8) y el del nácar incrustado —técnica llamada *raden*— (fig. 9) de la laca Namban.

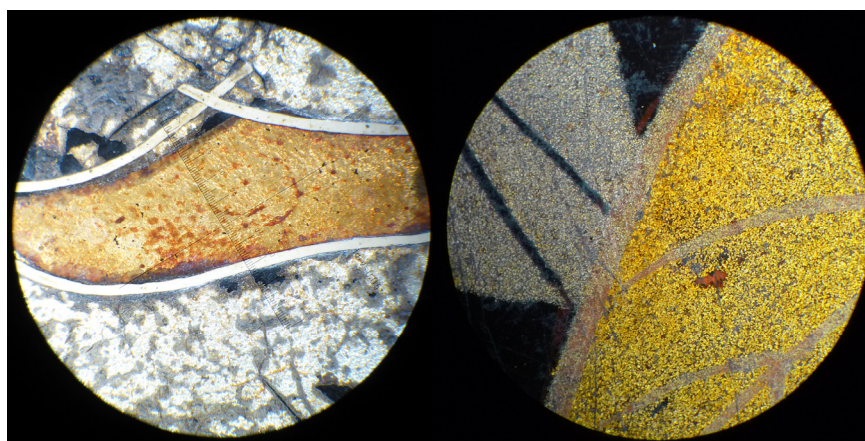

**Figura 8.** Detalle de hoja de planta de una arqueta de barniz de Pasto, colección particular (izquierda); y detalle del polvo de oro y de plata de un escritorio de laca de estilo Namban, monasterio de la Encarnación, Madrid, España (derecha). Fotografía de la autora.

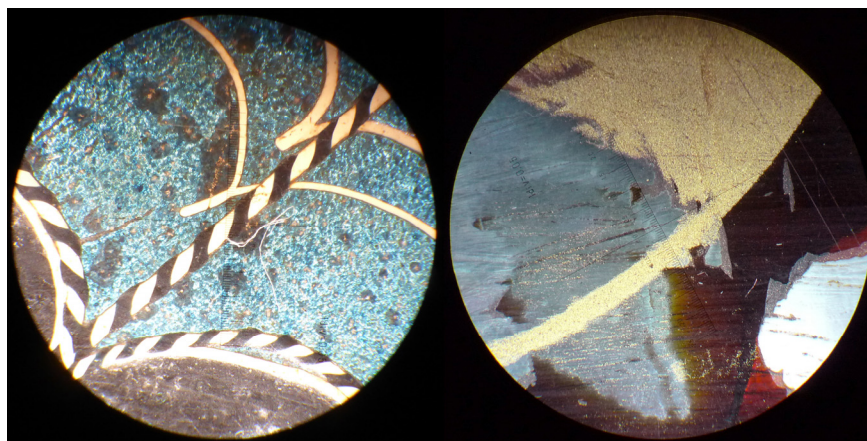

**Figura 9.** Detalle de la plata cubierta con una lámina azul de barniz de Pasto, colección particular (izquierda); y detalle del nácar en un escritorio de laca de estilo Namban, monasterio de las Descalzas Reales, Madrid, España (derecha). Fotografía de la autora.

Otra similitud con la laca japonesa es la aplicación de plata recortado en diminutos cuadros o rombos para expresar los detalles decorativos, como se aprecian en la arqueta de la parroquia de Mendigorria (fig. 10) o en uno escritorio del Museo de América de Madrid (nº 2015/08/01). El mismo recurso decorativo es usado en la laca japonesa a partir del siglo XIII, el llamado *kirikane*, y una técnica decorativa muy similar se aplica para el papel japonés desde el siglo XII. Este tipo de papel japonés era conocido en el mundo hispano y europeo. Por ejemplo, la carta de Date Masamune dirigida a la ciudad de Sevilla y la otra del mismo dirigida al papa Pablo V que el embajador Hasekura entregó en 1614 y 1615 respectivamente están escritas sobre unos papeles dorados decorados con pequeños cuadrados de pan de oro<sup>3</sup>.

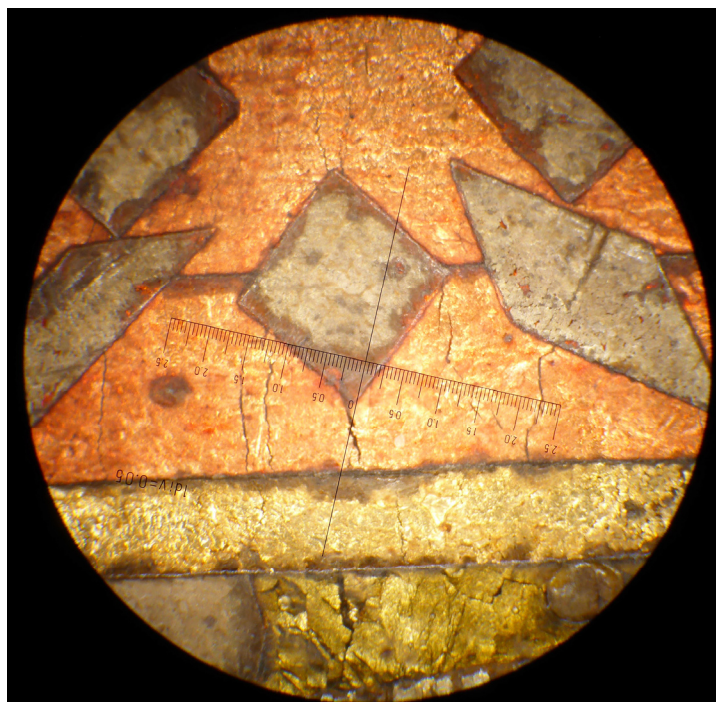

**Figura 10.** Detalle de una arqueta de barniz de Pasto, parroquia de Mendigorria, Navarra, España. Fotografía de la autora.



La presencia de bandas formando marcos es otra similitud que se observa en ambas artes, e incluso se detectan en el barniz de Pasto las variantes de los motivos geométricos repetitivos observados en la laca Namban. La banda de la arqueta de la catedral de Pamplona consta de unos rombos en cadena que recuerdan al patrón decorativo de la tradición japonesa llamado *shippô* (fig. 11), que se usa en la laca Namban. La banda a base de triángulos que recorren en el interior de la boca de la calabaza de Hispanic Society of America (nº LS2400) nos recuerda los motivos *kyoshimon*, dientes de sierra, usados también en la laca Namban.

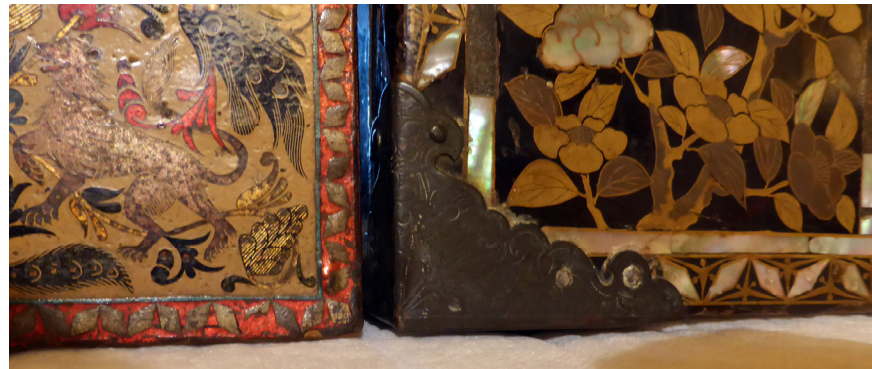

**Figura 11.** Detalle de una arqueta de barniz de Pasto, catedral de Pamplona, Navarra, España (izquierda); y detalle de una arqueta de laca de estilo Namban, parroquia de Cortes, Navarra, España (derecha). Fotografía de la autora.

Otro aspecto que nos llama la atención es la abundante producción de los objetos de barniz de Pasto brillante con fondo negro, que recuerdan la combinación cromática de la laca japonesa. Incluso cuando se aplican motivos decorativos con relieve sobre fondo negro como el caso de una pareja de copas en forma de piña de colección particular (fig. 6), el aspecto asemeja mucho a la técnica de *makie* en relieve (*taka makie*) aplicada en la laca de exportación de estilo denominado Pictórico (figs. 2, 12).

Bien es cierto que, tras el cierre de las fronteras de Japón en 1639, los únicos europeos que podían mantener el comercio, muy controlado y limitado por el gobierno nipón, fueron los holandeses, y por este motivo, tradicionalmente se ha planteado que el estilo Namban fue sustituido por el estilo Pictórico adaptándose al gusto de los holandeses y que ellos fueron los únicos que transportaban las lacas del estilo Pictórico a Europa. Sin embargo, consta la presencia de dos escritorios de estilo Pictórico en el Museo Alfañique de Puebla en México (fig. 12) —procedentes de la colección de José Luis Bello y González (1822–1907), sobre las cuales aún no hay definitiva averiguación de que estuvieran siempre en México, pero esta posibilidad es muy alta [32]— y otras en el monasterio del Espíritu Santo y en el convento de Santa Paula (fig. 2), ambos en Sevilla, el único puerto para la llegada de los barcos procedentes de Nueva España. Por otro lado, tenemos un documento histórico datado en 1719 que habla del envío de unos regalos protocolarios por parte del rey de Siam al rey de España a través del gobernador de Filipinas, en los que figuran dos escritorios de laca japonesa de estilo Pictórico, junto con piezas de porcelana japonesa<sup>4</sup>. El texto habla de "un escritorio grande, de maque muy fino de Japón". El dibujo que acompaña al documento (fig. 13) fue elaborado para explicar el montaje de una mesa suplementaria, y por esta razón no dibujaron los detalles decorativos del escritorio lacado, pero por su forma de dos puertas con asas laterales, vistosa placa de bocallave y grandes bisagras, el mueble corresponde indudablemente a un escritorio japonés de estilo Pictórico. Todo nos indica que aún después de 1639, las mercancías de lujo de Japón encabezadas por la laca de exportación fueron llegando al mundo hispánico a través de los barcos chinos que sí podían atracar en el puerto de Nagasaki, y que se encargaban de distribuir las a distintos destinos, a Siam o Manila entre otros. Asimismo, Japón mantenía contactos con



Corea a través del señorío de Tsushima, y el reino de Ryukyu, a pesar de estar sometido por el gobierno nipón, actuaba con cierta libertad en el Mar del Sur de China. Es decir, hubo más rutas que la holandesa para que la laca japonesa se comercializase a nivel internacional. Por lo tanto, no es nada extraño que los barnizadores del virreinato del Perú tuvieran la ocasión de contemplar los objetos de laca japonesa y de Ryukyu durante el siglo XVII e incluso XVIII.

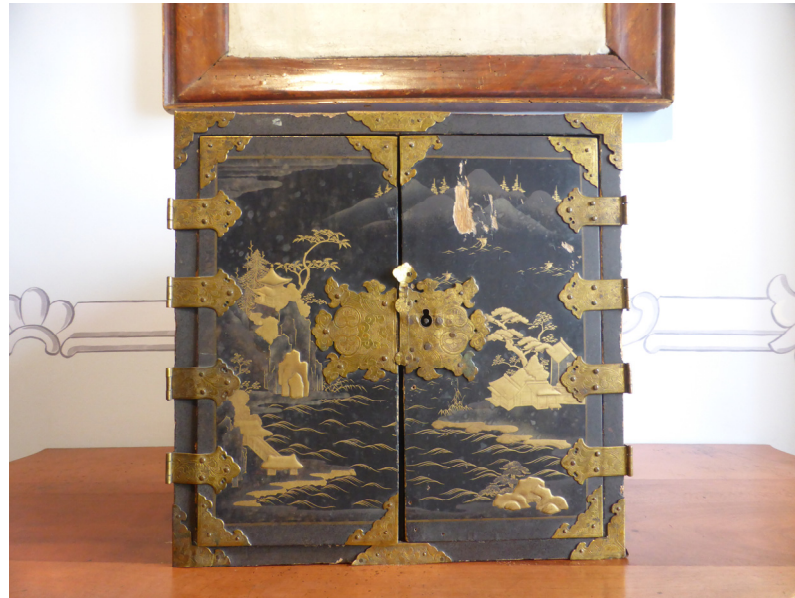

**Figura 12.** Escritorio de laca de estilo Pictórico, Museo de Alfañique, Puebla, México. Japón 1640-1700. Fotografía de la autora.

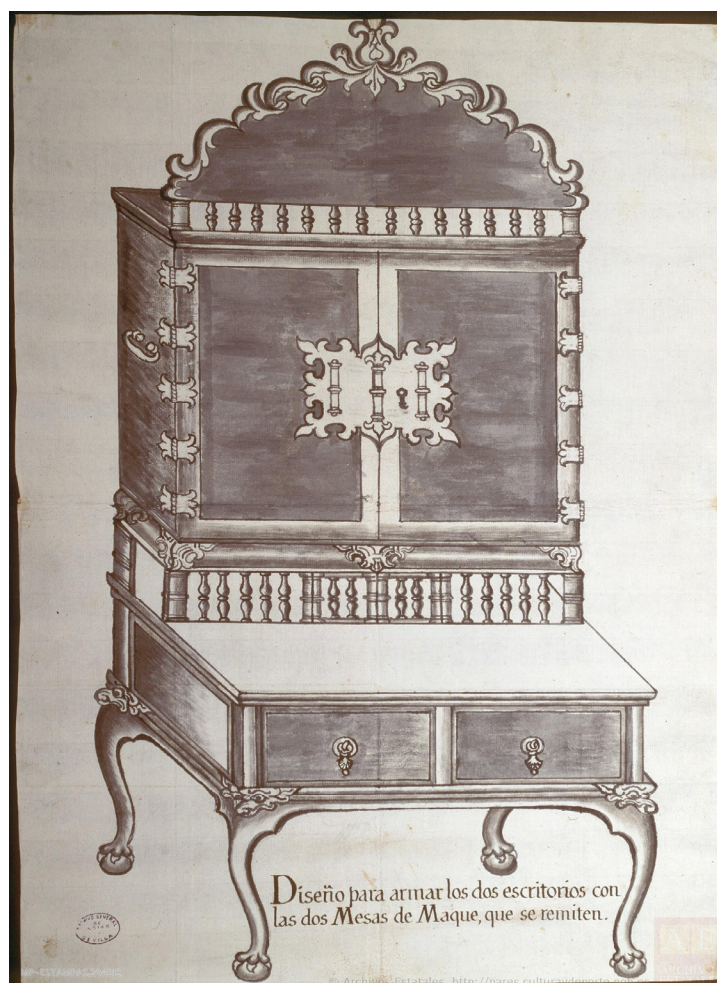

**Figura 13.** Dibujo de un escritorio de laca de estilo Pictórico, realizado en Manila, h. 1720. Archivo General de Indias, Sevilla, España.

### 3. Imágenes impresas de procedencia europea aplicadas en el barniz de Pasto

Una cuestión que viene debatiéndose entre los investigadores es el lugar o lugares de producción del barniz de Pasto. Aunque en la actualidad la práctica se limita al suroeste de Colombia, entorno a Pasto, López señala que hubo una importante actividad en Quito, probablemente vinculada con los talleres promovidos por los franciscanos y, asimismo, no se descarta la práctica de este arte en la zona central andina [15].

Partiendo de un análisis iconográfico de una arqueta de barniz de Pasto de colección particular (fig. 14), queremos ahondar en esta cuestión. Aunque la obra fue estudiada anteriormente [30], en esta ocasión, se intentará buscar nuevos indicios para atribuir su posible producción en los Andes Centrales. La arqueta está elaborada con el barniz de Pasto brillante, sin relieve. Aparte de aplicarse una rica gama cromática sobre fondo negro, la presencia de hoja de plata entre las láminas traslúcidas de distintos colores crea un intenso brillo sumamente atractivo. La arqueta está decorada tupidamente con variados motivos de flora y fauna del mundo tropical, y de algunas figuras humanas y animales fantásticos.

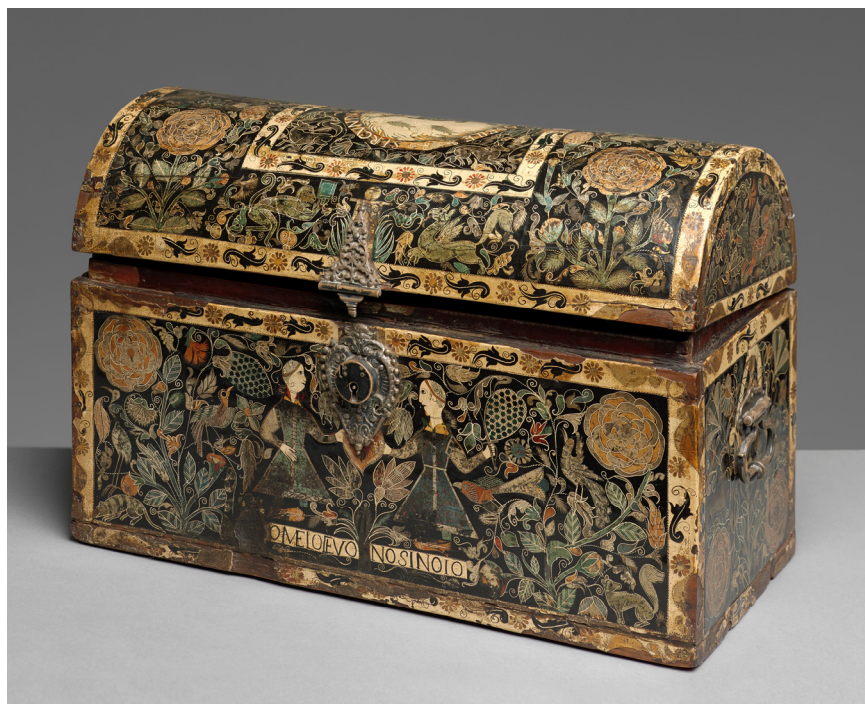

**Figura 14.** Arqueta de barniz de Pasto, colección particular. Virreinato del Perú, siglos XVII-XVIII. Fotografía de Marcos Morilla.

En el frente se encuentran dos figuras humanas de cuerpos muy esquemáticos sujetando con sus manos un objeto en forma de corazón o escudo. Debajo de ellas se encuentra una inscripción o un lema “O ME LO LLEVO / NO SINO IO”. Según los estudios de los emblemas, muy difundidos en la España de los siglos XVI y XVII [33], un corazón entre dos hombres representa la confianza o concordia, como figuran entre los emblemas creados por Sebastián de Covarrubias Horozco (1610) y Francisco de Zárrega (1684) [34] (pp. 233–234). En este caso, es probable que simbolice una concordia entre dos partes y el texto puede ser interpretado como la expresión de confianza.

En el centro del lado trasero figura un ave fénix con las alas rojas y doradas desplegadas y con una corona. Se levanta sobre una parrilla con fuego y se dirige hacia el cielo (fig. 15). Se trata de la iconografía habitual de esta ave mitológica, símbolo del resurgir y de la vida eterna en el cristianismo. Encima del ave se lee el texto: “EX ME IPSO RENASCOR”, que significa “de mí mismo renazco”. La frase puesta en boca del ave inmortal y su propia imagen constituyen uno de los emblemas ampliamente difundidos y además, como indica Esteban [35] era el logotipo del editor zaragozano Juan de Bonilla, como podemos ver en la portada del libro *Emblemas morales* de Juan de Horozco y Covarrubias (1604) [36] (fig. 15).



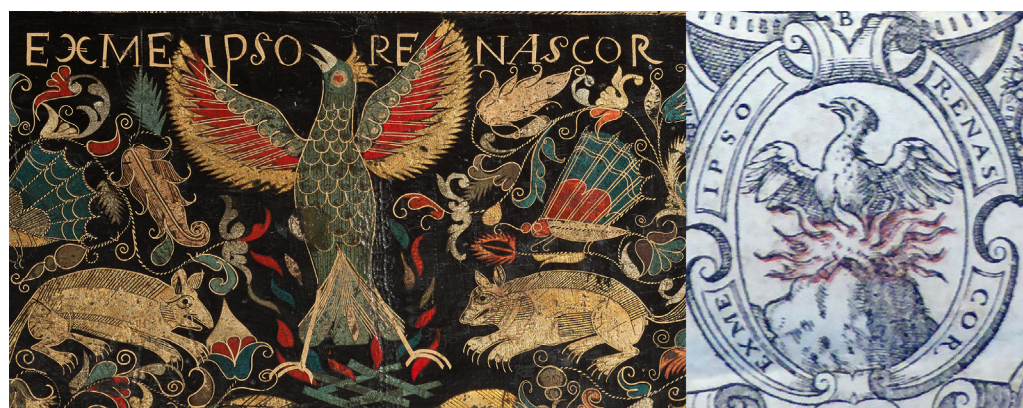

**Figura 15.** Detalle de la arqueta anterior. Fotografía de Marcos Morilla (izquierda). La portada del libro *Emblemas morales* de Juan de Horozco y Covarrubias (1604) (derecha).

En el centro de la tapa figura un círculo, en el que se representa el mundo acuático. Entre las olas nadan ocho peces y un animal fantástico, con el cuerpo escamado y la cola bífida (fig. 16). Puede corresponder a la serpiente Amaru, deidad quechua del agua. Mientras tanto, en cada uno de los lados laterales del arca, se aprecia un cuerpo alargado y serpenteante blanco unido con una calavera, símbolo de la muerte. El cuerpo ondulante sirve de filacteria, y encima se leen en latín "Mortales, estad preparados"<sup>5</sup> y "para el que piensa, pierde valor"<sup>6</sup>. Sin duda, son frases de enseñanza cristiana. Las filacterias con extremos bifurcados como estas son muy frecuentes en el antedicho libro *Emblemas morales* de Juan de Horozco y Covarrubias (1604). Y en la parte superior de ambos lados, que corresponden a los laterales de la tapa, figura una serpiente alada con la cabeza y patas delanteras de una bestia, que saca su lengua roja fuera. Este animal también se identifica como la serpiente Amaru (fig. 16), un ser con cuerpo de serpiente, escamado, alado y con la cabeza de llama (*Lama glama*, animal autóctono de los Andes). Como se ha comentado antes, se trata de una deidad del agua, y también de la fertilidad y de la sabiduría en la cultura quechua que se extiende en los Andes centrales. Parece evidente que el artista utilizó, por un lado, distintas imágenes de los emblemas españoles extraídos de algún libro que circulaba y, por otro lado, los combinó con la figura de Amaru de su cultura autóctona.

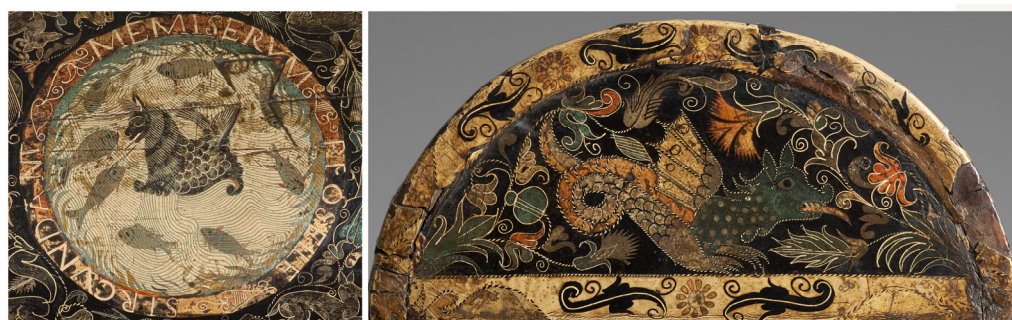

**Figura 16.** Detalles de la tapa de la arqueta anterior (izquierda) y de un lateral (derecha). Fotografía de Marcos Morilla.

Partiendo de la iconografía aquí analizada, intentamos plantear el posible lugar de elaboración. Están consideradas dos grandes zonas como centros de producción del barniz de Pasto en el periodo virreinal: el área de Pasto-Quito, en la que se practicaban principalmente objetos de formas europeas con *Elaegia pastoensis* y el área andina de Bolivia y Perú, donde se cree que continuaba la elaboración de los vasos *quero* decorados con *Elaegia utilis* [6] (p. 107) [11, 16]. La forma de arqueta está vinculada con la primera zona, y

además, la presente obra es de barniz de Pasto brillante, técnica hasta ahora conocida entre las obras elaboradas en los talleres de la zona de Pasto-Quito. Sin embargo, la presencia de Amaru, deidad de los Andes centrales hace vincular la obra a la segunda zona. A su vez, el uso de fondo negro y abigarrada composición con los elementos vegetales, aves, animales y seres humanos nos recuerda la arqueta pintada del Museo Casa de Murillo de La Paz, elaborada en Charazani (Bolivia) de la zona quechua [37], en el que figura la misma serpiente Amaru. Estos aspectos hacen muy interesante la obra. Aunque apenas conocemos actividades de los barnizadores en los Andes centrales en el periodo virreinal, esta obra podría haber sido elaborada en esa zona.

Otro aspecto que puede corroborar esta hipótesis es la aparición en el lado trasera del ave fénix entre las llamas y el lema “EX ME IPSO RENASCOR”, que corresponden exactamente al logotipo del editor Juan Bonilla (fig. 15). Un fenómeno muy semejante, es decir, la apropiación del logotipo que figura en una página muy visible de un libro europeo en una pintura hispanoamericana se observa en la zona andina central. Se trata de la pintura mural del coro de la iglesia de Carabuco (Bolivia), situado al lado del lago Titicaca [38], zona culturalmente quechua. En el centro del coro, localizado en la parte alta de la entrada del templo, figura un compás dorado en gran tamaño y una frase “Labore et Constantia”, que corresponden al logotipo del conocido impresor de Amberes Plantin-Motetus, cuyas publicaciones religiosas como el Misal publicado en 1737 se difundían en el mundo virreinal americano. La pintura se cree que fue promovida por el cacique Agustín después del colapso de esta parte de la iglesia en 1763. Estamos observando la misma manera de actuar que la observada en la arqueta analizada. Una imagen bien conocida que figura en una página visible de un libro europeo es apropiada. El compás dorado de la iglesia de Carabuco puede estar indicando el modo de actuar arraigado en la zona quechua. Teniendo en cuenta la presencia de la deidad quechua Amaru en la misma arqueta, la propuesta de que la arqueta fuera elaborada en la zona de los Andes centrales es sostenible.

#### 4. Conclusiones

En el intento de aclarar distintos aspectos del arte del barniz de Pasto, se han señalado recientemente, aparte de las influencias europeas, las asiáticas: de la laca japonesa y de Ryukyu, y también de los textiles asiáticos que llegaron a través del galeón de Manila al puerto de Acapulco, que posteriormente los comerciantes peruleros se encargaban de transportar al virreinato del Perú. La probabilidad de que los artífices del barniz de Pasto pudieron tomar contacto con la laca japonesa de exportación es considerable, teniendo en cuenta los tráficos comerciales existentes, y también analizando materialmente las similitudes de ambas artes. Asimismo, se propone la posibilidad de que los talleres donde se elaboraban las piezas de barniz de Pasto se localizaban, aparte de en la zona de Pasto-Quito, en los Andes centrales, territorio quechua, basándonos en la iconografía de Amaru y la apropiación de un logotipo del impresor español en una arqueta. De esta manera, podemos señalar las confluencias de distintas culturas, de Asia y de Europa, y la fusión y la apropiación de estas en la actividad artística del barniz de Pasto.

**Subvención:** Este estudio fue apoyado por la Agencia Estatal de Investigación del Gobierno de España, con referencia PGC2018-097694-B-I00.

**Declaración de disponibilidad de datos:** el autor confirma que los datos que respaldan los hallazgos de este estudio están disponibles en el artículo.

**Agradecimientos:** Agradezco sinceramente a Natasha Vargas (traductora), así como a Robert Espósito y Laura Ramirez Polo (revisores), de la Universidad de Rutgers, por la versión en inglés de este artículo.

**Conflicto de intereses:** La autora declara no tener conflicto de intereses.



## notas

1. El seminario “Las lacas” organizado por la directora Concepción García Saiz el 27 de octubre de 2017 y la “Jornada del Barniz de Pasto” organizada por la conservadora del arte virreinal Ana Zabala el 27 de junio de 2019, en el Museo de América, Madrid, Spain.
2. “Horror vacui” o horror al vacío significa una decoración densamente cargada.
3. La primera carta está conservada en el Archivo Municipal de Sevilla (ICAS-SAHP, 3779) y la segunda, en la Biblioteca Apostólica Vaticana (Borghese 363b).
4. Archivo General de Indias, Filipinas, 132, 22-24. Memoria del regalo que el rey de Siam hizo al rey nuestro señor por medio del embajador que despacho Fernando Manuel de Bustillo. Diseño para armar los dos escritorios con las dos mesas de maqué que se remiten.
5. “mor[....]s estote [.]arati”
6. “cogi [.a]ntivi lec si[t]”

## Referencias

1. Kawamura, Y.; Ancho, A.; Balduz, B. *Laca Namban. Brillo de Japón en Navarra*; Gobierno de Navarra: Pamplona, Spain, 2016; ISBN 978-84-235-3408-1.
2. Fundación Caja de Burgos. *Visiones de América. Arte desde el Confín del Mundo*; Fundación Caja de Burgos: Burgo, Spain, 2018; ISBN 978-84-947699-1-7.
3. Rishel, J.J.; Stratton-Pruitt, S. (Eds.). *The Arts in Latin America. 1492–1820*; Philadelphia Museum of Art: Philadelphia, PA, USA, 2006; ISBN 978-0-300-12003-5.
4. Aste, R. (Ed.) *Behind Closed Doors. Art in the Spanish American Home, 1492–1898*; Brooklyn Museum: New York, NY, USA, 2013; ISBN 13: 978-0-872-73172-1.
5. Carr, D. (Ed.) *Made in the Americas. The New World Discovers Asia*; Museum of Fine Arts, Boston: Boston, MA, USA, 2015; ISBN 9-780878-468126.
6. Codding, M. The Decorative Arts in Latin America, 1492–1820. In *The Arts in Latin America. 1492–1820*; Philadelphia Museum of Art: Philadelphia, PA, USA, 2006; pp. 98–113, ISBN 978-0-300-12003-5.
7. Codding, M. The Lacquer Arts of Latin América. In *Made in the Americas. The New World Discovers Asia*; Museum of Fine Arts, Boston: Boston, MA, USA, 2015; pp. 74–89, ISBN 9-780878-468126.
8. Friedemann, N.S. El barniz de Pasto: Arte y rito milenar, *Lámpara* **1985**, 96, 1.
9. Friedemann, N.S. El mopa-mopa o barniz de Pasto. Los marcos de la iglesia bogotana de Egipto. In *Lecciones Barrocas: Pinturas Sobre la Vida de la Virgen de la Ermita de Egipto*; Banco de la República, Museo de Arte Religioso: Bogotá, Colombia, 1990; pp. 40–53.
10. López Pérez, M.P. *En Torno al Estrado. Cajas de Uso Cotidiano en Santafé de Bogotá, Siglos XVI a XVIII*; Museo Nacional de Colombia: Bogotá, Colombia, 1996.
11. Newman, R.; Derrick, M. Painted Qero Cups from the Inka and Colonial Periods in Peru: An Analytical Study of Pigments and Media. In *Materials Issues in Art and Archaeology VI*; Materials Research Society: Warrendale, PA, USA, 2002; pp. 291–302, ISBN 978-1558999886.
12. Granda Paz, O. *Aproximaciones al Barniz de Pasto*; Editorial Travesías: Barranquilla, Colombia, 2007.
13. López Pérez, M.P. El Barniz de Pasto. Encuentro entre tradiciones locales y foráneas que han dado la identidad a la región andina del sur de Colombia. In *Patrimonio Cultural e Identidad*; Cabello Carro, P., Ed.; Ministerio de Cultura: Madrid, Spain, 2007; pp. 225–234.
14. Gómezjurado Garzón, A.J. Mopa-mopa o barniz de Pasto, comercialización indígena en el periodo colonial. *Estud. Latinoam. México* **2008**, 22–23, 82–93. Available online: [revistas.udenar.edu.co/index.php/rceilat/article/view/1349](http://revistas.udenar.edu.co/index.php/rceilat/article/view/1349) (accessed on 22 November 2022).
15. López Pérez, M.P. Quito, entre lo prehispánico y lo colonial. El Barniz de Pasto. In *Arte Quiteño. Más Allá de Quito*; Ortiz Crespo, A., Pacheco Bustillos, A., Eds.; FONSA: Quito, Ecuador, 2010; pp. 45–63, ISBN 9978-366-38.
16. Newman, R.; Kaplan, E.; Derrin, R. Mopa Mopa: Scientific Analysis and History of an Unusual South American Resin Used by the Inka and Artisans in Pasto, Colombia. *J. Am. Inst. Conserv.* **2015**, 54, 123–148. <https://doi.org/10.1179/1945233015Y.0000000005>.
17. Yuste López, C. *El Comercio de la Nueva España con Filipinas, 1570–1785*; INAH: Mexico City, Mexico, 1984.
18. Sales Colín, O. *El Movimiento Portuario de Acapulco: El Protagonismo de Nueva España en la Relación con Filipinas, 1587–1648*; Plaza y Valdés: Mexico City, Mexico, 2000; ISBN 968-8568202.
19. Valle Pavón, G. En torno a los mercaderes de la ciudad de México y el comercio de Nueva España. Aportaciones a la historiografía de la monarquía hispana del periodo 1670–1740. In *Los Virreinos de Nueva España y del Perú (1680–1740). Un Balance Historiográfico*; Lavallé, B., Ed.; Casa de Velázquez: Madrid, Spain, 2019; pp. 135–150, ISBN 9788490962077.

20. Suárez Espinosa, M. Sedas, rasos y damascos: Lima y el cierre del comercio triangular con México y Manila en la primera mitad del siglo XVII. *Am. Lat. Hist. Econ. Bol. Fuentes* **2015**, *22*, 101–134. Available online: [www.scielo.org.mx/pdf/alhe/v22n2/v22n2a5.pdf](http://www.scielo.org.mx/pdf/alhe/v22n2/v22n2a5.pdf) (accessed on 22 November 2022).
21. Bonialian, M. Las aguas olvidadas de la mar del sur. Comerciantes novohispanos y sus reexportaciones de mercaderías extranjeras hacia el Perú (1680–1740). *Hist. Mex.* **2012**, *61*, 995–1047. Available online: [historiamexicana.colmex.mx/index.php/RHM/article/view/246](http://historiamexicana.colmex.mx/index.php/RHM/article/view/246) (accessed on 22 November 2022).
22. Bonialian, M. La “ropa de la China” desde Filipinas hasta Buenos Aires. Circulación, consumo y lucha corporativa, 1580–1620. *Rev. De Indias* **2016**, *76*, 641–672. <https://doi.org/10.3989/revindias.2016.020>.
23. López Pérez, M.P. Objeto de barniz de Pasto con referentes artísticos del Asia. In proceedings of the Lecture in the National Museum of Colombia, Bogotá, Colombia, 19 May 2021.
24. Mínguez, V.; Rodríguez, I. Japan in the Spanish Empire. Circulation of Works of Art and Imaginings of Cipango in Metropolitan Spain and the American Viceroyalties. *Bull. Port. Jpn. Stud.* **2009**, *18*, 9–20. Available online: [www.redalyc.org/pdf/361/36129851008.pdf](http://www.redalyc.org/pdf/361/36129851008.pdf) (accessed on 22 November 2022).
25. Morga, A.; Hidalgo Nuchera, P. *Sucesos de las Islas Filipinas*; Polifemo: Madrid, Spain, 1997; ISBN 9788486547370.
26. Romero de Terreros, M. Relación del Japón (1609) por Rodrigo de Vivero y Velasco. Introducción y notas. *An. Del Mus. Nac. México* **1934**, *26*, 67–111.
27. Kawamura, Y. Manila, ciudad española y centro de fusión. Un estudio a través del inventario del gobernador de Filipinas Alonso Fajardo de Tenza (1624). *e-Spania* **2018**, *30*, 1–13. <https://doi.org/10.4000/e-spania.27950>.
28. Kawamura, Y. Obras de laca Namban en España. Síntesis de la globalización bajo la monarquía hispánica. In *Arte y Globalización en el Mundo Hispánico de los Siglos XV al XVII*; Parada López de Corselas, M., María Palacios Méndez, L.M., Eds.; Universidad de Granada: Granada, Spain, 2020; pp. 531–550, ISBN 978-84-338-6664-6.
29. Rivero Lake, R. *El Arte Namban en el México Virreinal*; Turner: Mexico City, Mexico, 2005; ISBN 978-84-7506-693-6.
30. Kawamura, Y. Encuentro multicultural en el arte de barniz de Pasto o la laca del Virreinato del Perú. *Hist. Y Soc.* **2018**, *35*, 87–112. <https://doi.org/10.15446/hys.n35.69838>.
31. Kawamura, Y. El Barniz de Pasto y las lacas de Japón: Contexto histórico de sus encuentros. *An. Mus. Am.* **2020**, *28*, 99–108. Available online: [www.culturaydeporte.gob.es/museodeamerica/dam/jcr:591b0990-1a28-45df-aea6-e9a4f5b7b21d/07-anales-del-museo-de-america-xxviii-2020-kawamura-99-108.pdf](http://www.culturaydeporte.gob.es/museodeamerica/dam/jcr:591b0990-1a28-45df-aea6-e9a4f5b7b21d/07-anales-del-museo-de-america-xxviii-2020-kawamura-99-108.pdf) (accessed on 22 November 2022).
32. Ocaña Ruiz, S.; Arimura, R. Japanese objects in New Spain: Nanban art and beyond. *Colon. Lat. Am. Rev.* **2022**, *31*, 327–353. <https://doi.org/10.1080/10609164.2022.2104033>.
33. Sebastián López, S. *Emblemática e Historia del Arte*; Cátedra: Madrid, Spain, 1995; ISBN 843761355-8.
34. Bernat, A.; Cull, J.T. *Enciclopedia Akal de Emblemas Españoles Ilustrados*; Ediciones Akal: Madrid, Spain, 1999; ISBN 978-8446010753.
35. Horozco y Covarrubias, J. *Emblemas Morales*; Juan de Bonilla: Zaragoza, Spain, 1604.
36. Esteban Llorente, J.F. Influjo de emblema en el arte aragonés. In *Emblemata Aurea: La Emblemática en el Arte y la Literatura del Siglo de Oro*; Zafra, R., Azanza, J.J., Eds.; Akal: Madrid, Spain, 2000; pp. 143–162, ISBN 978-84-460-1490-4.
37. Gisbert de Mesa, T. Chest. In *The Arts in Latin America. 1492–1820*; Philadelphia Museum of Art: Philadelphia, PA, USA, 2006; p. 129, ISBN 978-0-300-12003-5.
38. Okada, H. ‘Golden Compas’ on the Shores of Lake Titicaca: The Appropriation of European Visual Culture and the Patronage of Art by an Indigenous Cacique in the Colonial Andes. *Mem. Grad. Sch. Lett. Osaka Univ.* **2011**, *51*, 87–111. Available online: [www.academia.edu/29167585/\\_Golden\\_Compasses\\_on\\_the\\_Shores\\_of\\_Lake\\_Titicaca\\_The\\_Appropriation\\_of\\_European\\_Visual\\_Culture\\_and\\_the\\_Patronage\\_of\\_Art\\_by\\_an\\_Indigenous\\_Cacique\\_in\\_the\\_Colonial\\_Andes](http://www.academia.edu/29167585/_Golden_Compasses_on_the_Shores_of_Lake_Titicaca_The_Appropriation_of_European_Visual_Culture_and_the_Patronage_of_Art_by_an_Indigenous_Cacique_in_the_Colonial_Andes) (accessed on 22 November 2022).

**Disclaimer/Publisher’s Note:** The statements, opinions and data contained in all publications are solely those of the individual author(s) and contributor(s) and not of MDPI and/or the editor(s). MDPI and/or the editor(s) disclaim responsibility for any injury to people or property resulting from any ideas, methods, instructions or products referred to in the content.
